# Supplementary material for: Osteosarcoma-Specific Genes as a Diagnostic Tool and Clinical Predictor of Tumor Progression
Source: MDPI journal article supplement (doi:10.3390/biology11050698), 2022-05-01
Supplement: s1 [file s1]

**Table S1.** The microarray expression data sets used in this study are publicly available (continued).

| Entity                 | GEOAccession codes |            | Title of Samples                                                              |
|------------------------|--------------------|------------|-------------------------------------------------------------------------------|
|                        | Series             | Sample     |                                                                               |
| OS cell line<br>(n=29) | GSE70414           | GSM1727193 | 1. MG63 [mRNA]                                                                |
|                        |                    | GSM1727194 | 2. Saos [mRNA]                                                                |
|                        |                    | GSM1727195 | 3. HOS [mRNA]                                                                 |
|                        |                    | GSM1727196 | 4. NY [mRNA]                                                                  |
|                        |                    | GSM1727197 | 5. Hu09 [mRNA]                                                                |
|                        | GSE30807           | GSM764200  | 6. osteosarcoma U2OS cells                                                    |
|                        | GSE37552           | GSM921514  | 7. Human_Osteosarcoma_Non-Metastatic_SaOS-2_Parental Line                     |
|                        |                    | GSM921515  | 8. Human_Osteosarcoma_Metastatic_LM7_Subline of SaOS-2                        |
|                        |                    | GSM921516  | 9. Human_Osteosarcoma_Non-Metastatic_HOS_Parental Line                        |
|                        |                    | GSM921517  | 10. Human_Osteosarcoma_Metastatic_143B_Subline of HOS                         |
|                        | GSE18947           | GSM469260  | 11. low metastatic potential cell subline of Sosp-9607, biological rep1       |
|                        |                    | GSM469261  | 12. low metastatic potential cell subline of Sosp-9607, biological rep2       |
|                        |                    | GSM469264  | 13. low metastatic potential cell subline of Saos-2                           |
|                        | GSE16089           | GSM402655  | 14. Saos-2 parental cells replicate 1                                         |
|                        |                    | GSM402656  | 15. Saos-2 parental cells replicate 2                                         |
|                        |                    | GSM402657  | 16. Saos-2 parental cells replicate 3                                         |
|                        | GSE7454            | GSM180459  | 17. U-2OS (no-treatment) expression profile (AffyChip U133 Plus 2.0 platform) |
|                        | GSE41828           | GSM1025090 | 18. U2OS, Untreated 24 hours rep1                                             |
|                        |                    | GSM1025091 | 19. U2OS, Untreated 24 hours rep2                                             |
|                        |                    | GSM1025092 | 20. U2OS, Untreated 24 hours rep3                                             |
|                        |                    | GSM1025093 | 21. U2OS, Untreated 24 hours rep4                                             |
|                        |                    | GSM1025094 | 22. U2OS, Untreated 24 hours rep5                                             |
|                        | GSE46493           | GSM1131226 | 23. U2OS No Treatment, Replicate 1                                            |
|                        |                    | GSM1131227 | 24. U2OS No Treatment, Replicate 2                                            |
|                        |                    | GSM1131228 | 25. U2OS No Treatment, Replicate 3                                            |

**Table S1.** *Cont.*

| Entity                        | GEOAccession codes |            | Title of Samples                              |
|-------------------------------|--------------------|------------|-----------------------------------------------|
|                               | Series             | Sample     |                                               |
| OS cell line<br>(n=29)        | GSE41445           | GSM1017514 | 26. U2OS_21a                                  |
|                               |                    | GSM1017515 | 27. U2OS_21b                                  |
|                               |                    | GSM1017516 | 28. U2OS_21c                                  |
|                               | GSE55957           | GSM1349294 | 29. ZOS osteosaracoma cell line               |
| Primay OS cells<br>(n=3)      | GSE85537           | GSM2276632 | 30. Bone1, biological rep1                    |
|                               |                    | GSM2276633 | 31. Bone2, biological rep2                    |
|                               |                    | GSM2276634 | 32. Bone3, biological rep3                    |
| Healthy whole blood<br>(n=43) | GSE93272           | GSM2449608 | 33. Whole blood from healthy control(HC003_1) |
|                               |                    | GSM2449609 | 34. Whole blood from healthy control(HC004_1) |
|                               |                    | GSM2449610 | 35. Whole blood from healthy control(HC005_1) |
|                               |                    | GSM2449611 | 36. Whole blood from healthy control(HC006_1) |
|                               |                    | GSM2449612 | 37. Whole blood from healthy control(HC007_1) |
|                               |                    | GSM2449613 | 38. Whole blood from healthy control(HC008_1) |
|                               |                    | GSM2449614 | 39. Whole blood from healthy control(HC009_1) |
|                               |                    | GSM2449615 | 40. Whole blood from healthy control(HC010_1) |
|                               |                    | GSM2449616 | 41. Whole blood from healthy control(HC011_1) |
|                               |                    | GSM2449617 | 42. Whole blood from healthy control(HC012_1) |
|                               |                    | GSM2449618 | 43. Whole blood from healthy control(HC013_1) |
|                               |                    | GSM2449619 | 44. Whole blood from healthy control(HC015_1) |
|                               |                    | GSM2449620 | 45. Whole blood from healthy control(HC016_1) |
|                               |                    | GSM2449621 | 46. Whole blood from healthy control(HC017_1) |
|                               |                    | GSM2449622 | 47. Whole blood from healthy control(HC018_1) |
|                               |                    | GSM2449623 | 48. Whole blood from healthy control(HC019_1) |
|                               |                    | GSM2449624 | 49. Whole blood from healthy control(HC020_1) |
|                               |                    | GSM2449625 | 50. Whole blood from healthy control(HC021_1) |
|                               |                    | GSM2449626 | 51. Whole blood from healthy control(HC022_1) |
|                               |                    | GSM2449627 | 52. Whole blood from healthy control(HC023_1) |
|                               |                    | GSM2449628 | 53. Whole blood from healthy control(HC024_1) |

**Table S1. Cont.**

| Entity                     | GEOAccession codes |            | Title of Samples |                                           |
|----------------------------|--------------------|------------|------------------|-------------------------------------------|
|                            | Series             | Sample     |                  |                                           |
| Healthy whole blood (n=43) | GSE93272           | GM2449629  | 54.              | Whole blood from healthy control(HC025_1) |
|                            |                    | GSM2449630 | 55.              | Whole blood from healthy control(HC026_1) |
|                            |                    | GSM2449631 | 56.              | Whole blood from healthy control(HC027_1) |
|                            |                    | GSM2449632 | 57.              | Whole blood from healthy control(HC028_1) |
|                            |                    | GSM2449633 | 58.              | Whole blood from healthy control(HC030_1) |
|                            |                    | GSM2449634 | 59.              | Whole blood from healthy control(HC031_1) |
|                            |                    | GSM2449635 | 60.              | Whole blood from healthy control(HC034_1) |
|                            |                    | GSM2449636 | 61.              | Whole blood from healthy control(HC035_1) |
|                            |                    | GSM2449637 | 62.              | Whole blood from healthy control(HC036_1) |
|                            |                    | GSM2449668 | 63.              | Whole blood from healthy control(AU_2)    |
|                            |                    | GSM2449669 | 64.              | Whole blood from healthy control(AW_2)    |
|                            |                    | GSM2449670 | 65.              | Whole blood from healthy control(AY_2)    |
|                            |                    | GSM2449671 | 66.              | Whole blood from healthy control(BA_2)    |
|                            |                    | GSM2449672 | 67.              | Whole blood from healthy control(BB_2)    |
|                            |                    | GSM2449673 | 68.              | Whole blood from healthy control(HC003_2) |
|                            |                    | GSM2449674 | 69.              | Whole blood from healthy control(HC005_2) |
|                            |                    | GSM2449675 | 70.              | Whole blood from healthy control(HC008_2) |
|                            |                    | GSM2449676 | 71.              | Whole blood from healthy control(HC023_2) |
|                            |                    | GSM2449677 | 72.              | Whole blood from healthy control(HC025_2) |
|                            |                    | GSM2449678 | 73.              | Whole blood from healthy control(HC026_2) |
|                            |                    | GSM2449679 | 74.              | Whole blood from healthy control(HC034_2) |
|                            |                    | GSM2449680 | 75.              | Whole blood from healthy control(HC036_2) |

**Table S2.** Clinical characteristics of OS patients and healthy donors (primary cells and PBMCs, respectively).

| Parameters         |               | OS patients (n=24) | Healthy donors (n=12) |
|--------------------|---------------|--------------------|-----------------------|
| Median age [range] |               | 19 [5–61]          | 22 [19–29]            |
| Gender             | Male          | 12 (50.0%)         | 5 (41.7%)             |
|                    | Female        | 12 (50.0%)         | 7 (58.3%)             |
| Enneking stage     | IIB           | 19 (79.2%)         | -                     |
|                    | III           | 5 (20.8%)          | -                     |
| Tumor location     | Femur         | 13 (51.2%)         | -                     |
|                    | Tibia         | 6 (25.0%)          | -                     |
|                    | Other         | 5 (20.8%)          | -                     |
| Metastasis         | Bone          | 1 (4.2%)           | -                     |
|                    | Lung          | 3 (12.5%)          | -                     |
|                    | Bone and lung | 1 (4.2%)           | -                     |
|                    | None          | 19 (79.2%)         | -                     |

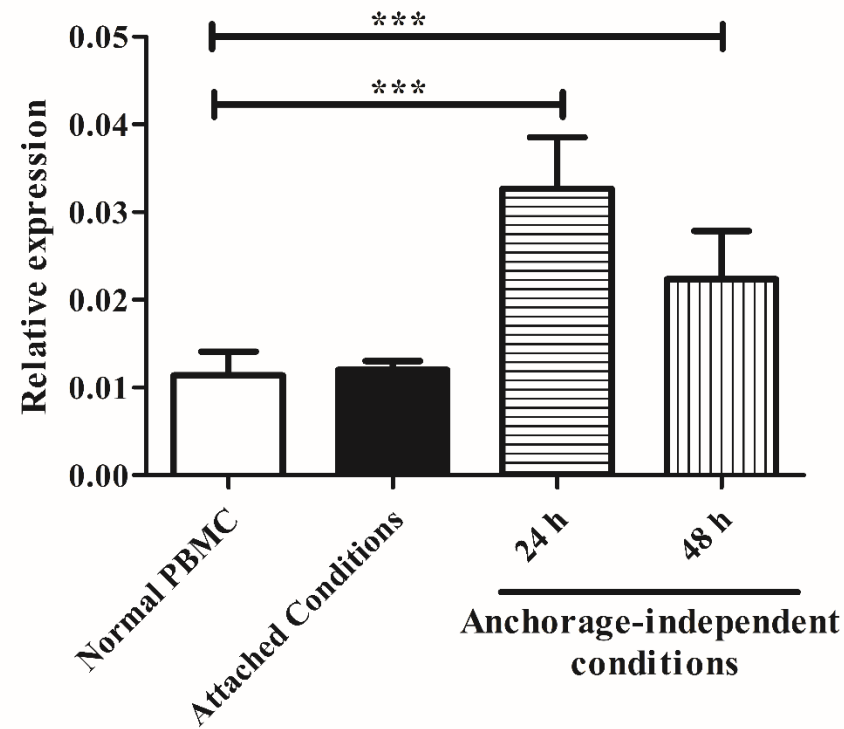

**Figure S1.** Comparison of the expression of ezrin among normal PBMCs, SaOS-2 (Human OS cell lines) in attached conditions and anchorage-independent conditions. The relative expression of *ezrin* was quantified by qRT-PCR in 12 samples of normal PBMCs and SaOS-2. Expression data were normalized on  $\beta$ -actin RNA level by the  $2^{-\Delta C_t}$  method. Each sample was analyzed in triplicate. Data are displayed as vertical scatter plots with bars representing mean  $\pm$  SD. The One-Way ANOVA test was used to determine  $p$ -values: \*\*\*,  $p < 0.0001$ .

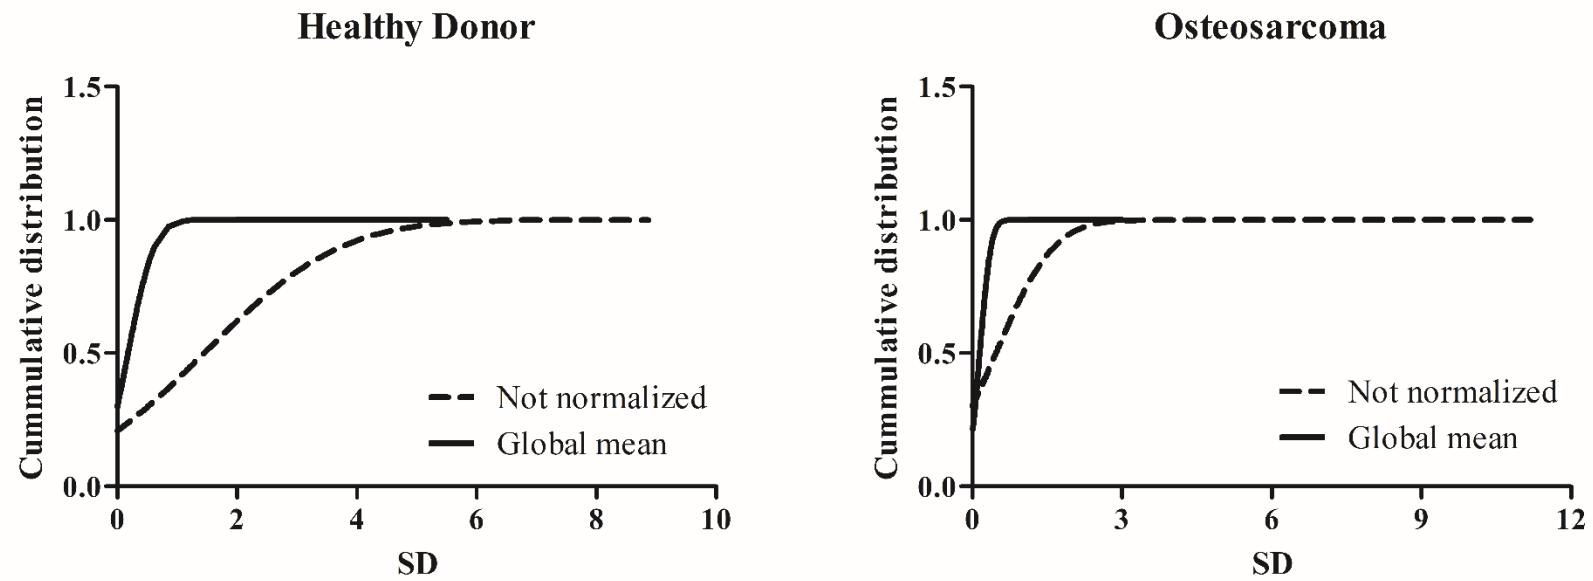

**Figure S2.** Cumulative distributions (CV) of the standard deviation (SD). Standard deviations (SDs) for each individual gene in the healthy and OS buffy coat samples presented not normalized (- -) and global mean normalized expression data (—).

## **Materials and Methods**

### **Cell culture as anchorage-independent conditions**

To mimic circulating tumor cell condition, Saos-2 osteosarcoma cell line was cultured on 6-well culture plate which coated with 450  $\mu$ l of 6 mg/ml poly(2-hydroxyethyl methacrylate) or polyHEMA (Sigma-Aldrich, St. Louis, MO, USA) each well for 24 and 48 hours. The resistant osteosarcoma cells were observed under light microscope.
